# Supplementary material
Source: ML conference proceedings conference paper supplement (https://proceedings.neurips.cc/paper_files/paper/2016/hash/b1301141feffabac455e1f90a7de2054-Abstract.html)
Supplement: Supplementary file [file b1301141feffabac455e1f90a7de2054-Supplemental.zip]

---

# Conditional Image Generation with PixelCNN Decoders

---

**Aäron van den Oord**  
Google DeepMind  
avdnoord@google.com

**Nal Kalchbrenner**  
Google DeepMind  
nalk@google.com

**Oriol Vinyals**  
Google DeepMind  
vinyals@google.com

**Lasse Espeholt**  
Google DeepMind  
espeholt@google.com

**Alex Graves**  
Google DeepMind  
gravesa@google.com

**Koray Kavukcuoglu**  
Google DeepMind  
korayk@google.com

## Appendix

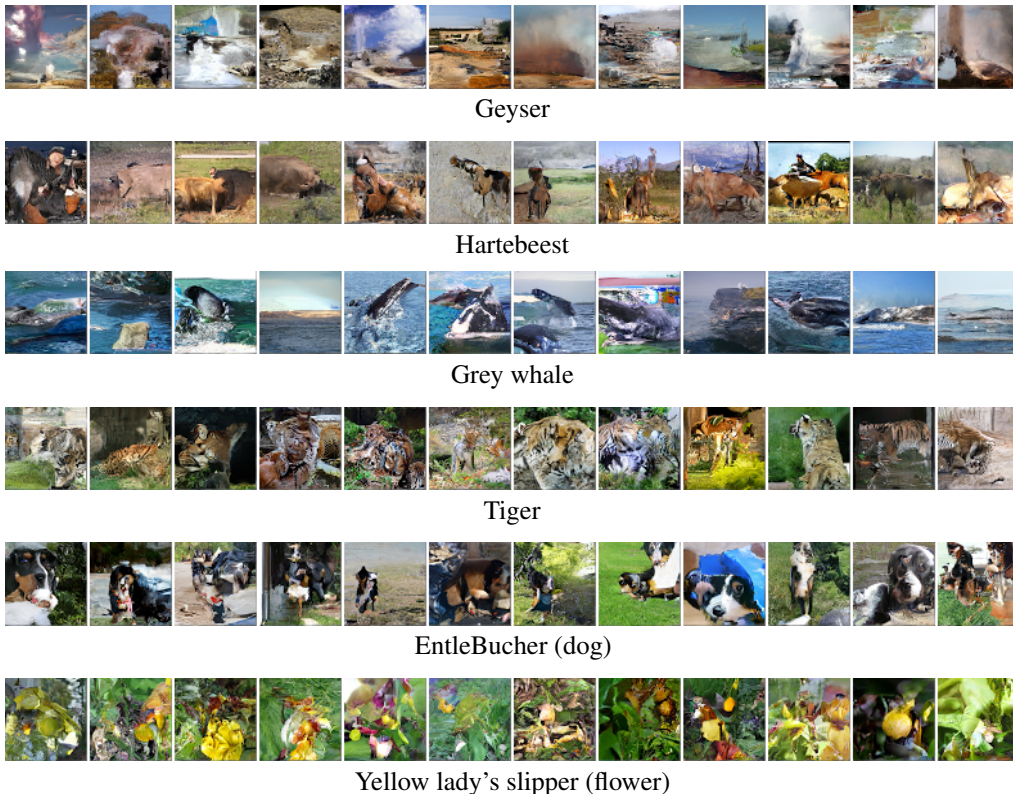

Figure 1: Class-Conditional (multi-scale  $64 \times 64$ ) samples from the Conditional PixelCNN.

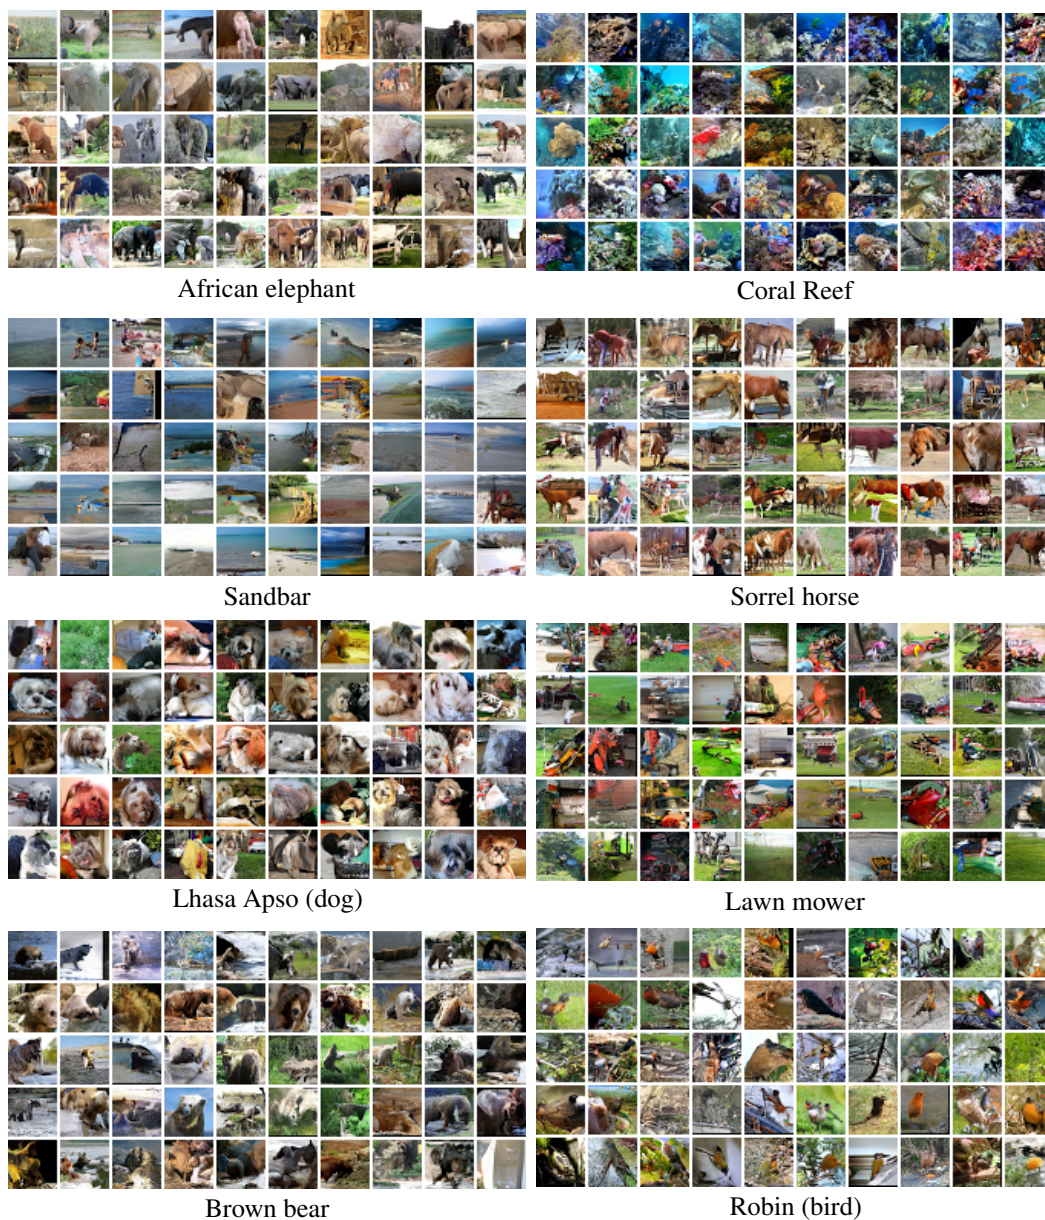

Figure 2: Class-Conditional  $32 \times 32$  samples from the Conditional Pixel CNN.



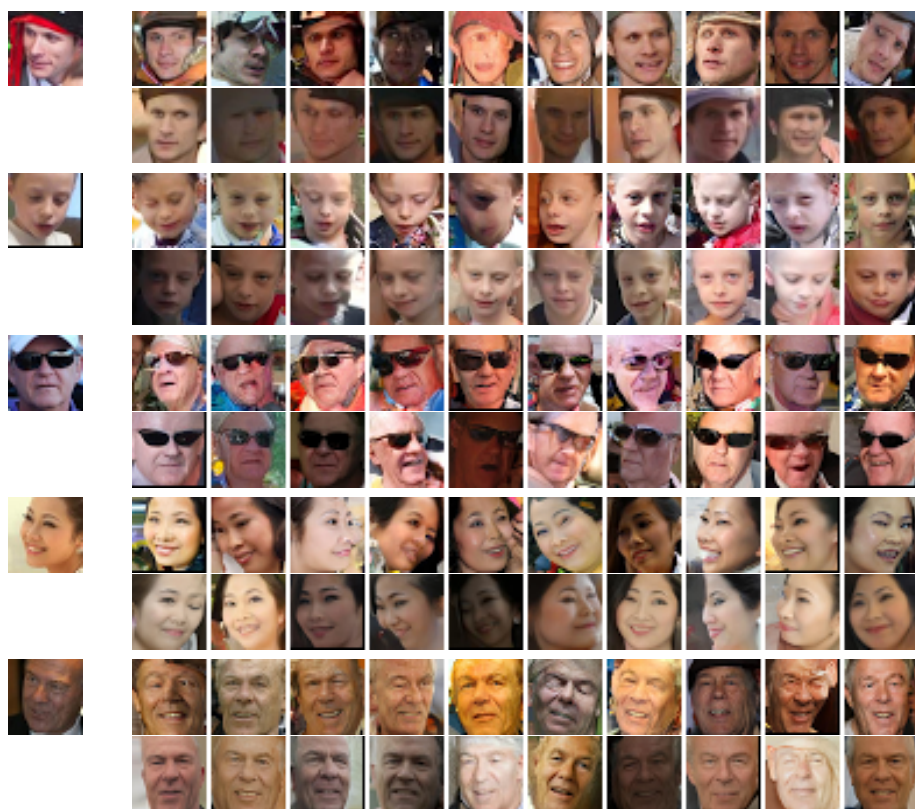

Figure 3: **Left:** source image. **Right:** new portraits generated from high-level latent representation.

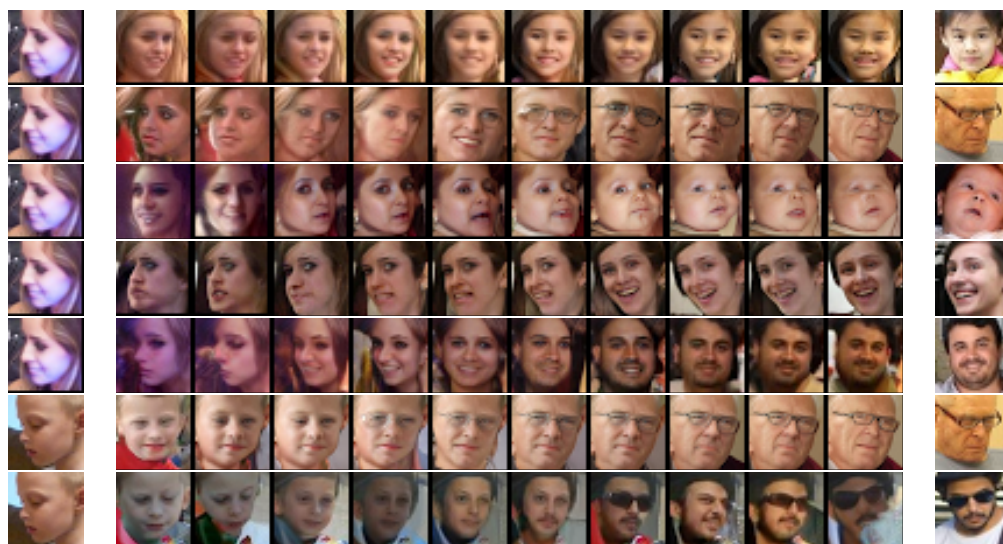

Figure 4: Linear interpolations in the embedding space decoded by the Pixel CNN. Embeddings from leftmost and rightmost images are used for endpoints of the interpolation.

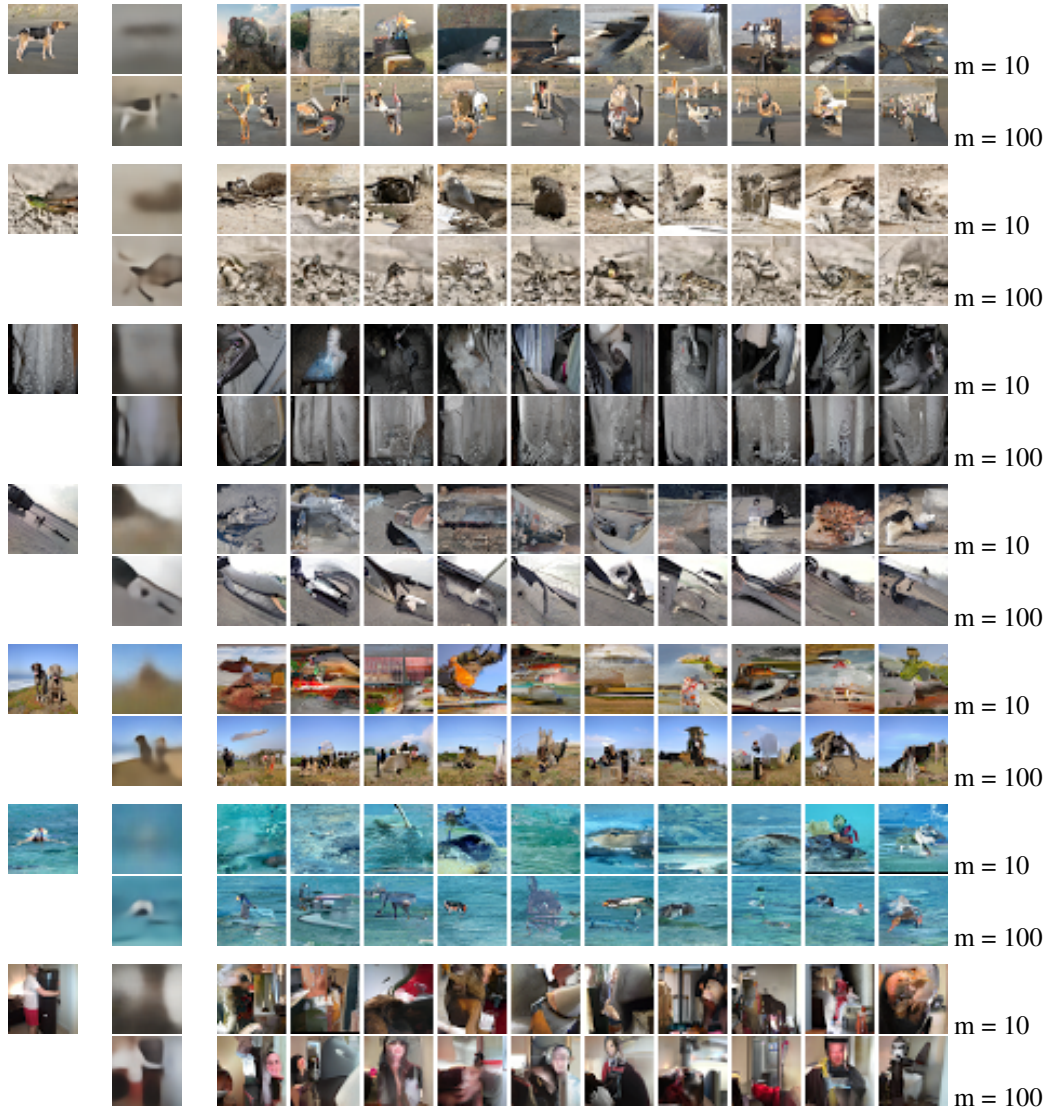

Figure 5: Left to right: original image, reconstruction by an auto-encoder trained with MSE, conditional samples from a Pixel CNN auto-encoder. Both auto-encoders were trained end-to-end with a  $m = 10$ -dimensional bottleneck and a  $m = 100$  dimensional bottleneck.
